# Supplementary material for: Stemness of the Organ of Corti Relates to the Epigenetic Status of Sox2 Enhancers
Source: PLoS One. 2012 May 3;7(5):e36066. doi: 10.1371/journal.pone.0036066 (PMC3343037; doi:10.1371/journal.pone.0036066)
Supplement: Table S2 — qPCR data shown as ΔΔ CT values. (XLS) [file pone.0036066.s008.xls]

## Sheet: Tabelle1
Table S2A
target	value	mean	95% value ci low	95% value ci high	n
cMyc
	ESC	1	0.799	1.252	3
	NSC	70.559	67.986	73.229	3
	OCSC	20.944	18.72	23.433	3
Klf4
	ESC	1	0.854	1.171	3
	NSC	0.081	0.076	0.087	3
	OCSC	2.631	2.19	3.16	3
Sox2
	ESC	1	0.782	1.278	3
	NSC	5.84	5.554	6.14	3
	OCSC	0.623	0.367	1.059	3
Nanog
	ESC	1	0.494	2.025	3
	NSC	0.004	NaN	NaN	1
	OCSC	0.018	0.006	0.051	3
Oct3/4
	ESC	1	0.834	1.199	3
	NSC	0.001	NaN	NaN	0
	OCSC	0.004	NaN	NaN	1
target	p	r2	comparison	ratio	95% ci low	95% ci high	significant
cMyc	1.893e-09	0.999
			NSC/ESC	70.559	60.878	81.779	Yes
			OCSC/ESC	20.944	18.071	24.275	Yes
			OCSC/NSC	0.297	0.256	0.344	Yes
Klf4	2.868e-09	0.999
			NSC/ESC	0.081	0.07	0.094	Yes
			OCSC/ESC	2.631	2.275	3.042	Yes
			OCSC/NSC	32.385	28.004	37.452	Yes
Sox2	3.808e-06	0.987
			NSC/ESC	5.84	4.153	8.211	Yes
			OCSC/ESC	0.623	0.443	0.876	Yes
			OCSC/NSC	0.107	0.076	0.15	Yes
Nanog	0.0002224	0.985
			NSC/ESC	0.004	0.001	0.017	Yes
			OCSC/ESC	0.018	0.006	0.05	Yes
			OCSC/NSC	4.625	1.048	20.408	Yes
Oct3/4	0.0002224	1
			NSC/ESC	NaN	NaN	NaN	Yes
			OCSC/ESC	0.004	0.002	0.006	Yes
			OCSC/NSC	NaN	NaN	NaN	Yes
Reference	M	CV
HPRT1	1.419	0.402
TbP	1.419	0.533
Average	1.419	0.467
Table S2B
target	value	mean	95% value ci low	95% value ci high	n
Prox1
	OC_E13.5	1	0.883	1.133	3
	OC_P4	6.68	4.95	9.013	3
	OC_P21	8.214	7.067	9.548	3
cMyc
	OC_E13.5	1	0.835	1.198	3
	OC_P4	0.299	0.234	0.382	3
	OC_P21	0.07	0.049	0.098	3
Atho1
	OC_E13.5	1	0.588	1.701	3
	OC_P4	1.467	1.028	2.093	3
	OC_P21	0.139	0.082	0.238	3
p27Kip1
	OC_E13.5	1	0.925	1.081	3
	OC_P4	1.937	1.629	2.302	3
	OC_P21	2.529	1.928	3.319	3
Sox2
	OC_E13.5	1	0.721	1.387	3
	OC_P4	3.944	2.948	5.276	3
	OC_P21	1.003	0.65	1.549	3
Klf4
	OC_E13.5	1	0.556	1.797	3
	OC_P4	1.102	0.173	7.012	2
	OC_P21	0.644	0.531	0.78	3
Myosin VIIA
	OC_E13.5	1	0.752	1.33	3
	OC_P4	1.49	0.841	2.641	3
	OC_P21	0.751	0.297	1.901	3
target	p	r2	comparison	ratio	95% ci low	95% ci high	significant
Prox1	9.227e-07	0.995
			OC_P21/OC_E13.5	8.214	6.672	10.113	Yes
			OC_P4/OC_E13.5	6.68	5.426	8.224	Yes
			OC_P4/OC_P21	0.813	0.661	1.001	No
cMyc	9.227e-07	0.994
			OC_P21/OC_E13.5	0.07	0.053	0.091	Yes
			OC_P4/OC_E13.5	0.299	0.229	0.391	Yes
			OC_P4/OC_P21	4.304	3.291	5.629	Yes
Atho1	2.832e-05	0.977
			OC_P21/OC_E13.5	0.139	0.086	0.226	Yes
			OC_P4/OC_E13.5	1.467	0.904	2.382	No
			OC_P4/OC_P21	10.536	6.489	17.108	Yes
p27Kip1	2.833e-05	0.975
			OC_P21/OC_E13.5	2.529	2.086	3.066	Yes
			OC_P4/OC_E13.5	1.937	1.598	2.348	Yes
			OC_P4/OC_P21	0.766	0.632	0.928	Yes
Sox2	4.495e-05	0.968
			OC_P21/OC_E13.5	1.003	0.701	1.436	No
			OC_P4/OC_E13.5	3.944	2.755	5.645	Yes
			OC_P4/OC_P21	3.932	2.747	5.628	Yes
Klf4	0.04541	0.727
			OC_P21/OC_E13.5	0.644	0.397	1.043	No
			OC_P4/OC_E13.5	1.102	0.642	1.89	No
			OC_P4/OC_P21	1.711	0.997	2.936	No
Myosin VIIA	0.04937	0.633
			OC_P21/OC_E13.5	0.751	0.39	1.446	No
			OC_P4/OC_E13.5	1.49	0.774	2.87	No
			OC_P4/OC_P21	1.985	1.03	3.823	Yes
Reference	M	CV
HPRT1	0.231	0.079
Ubiquitin C	0.231	0.081
Average	0.231	0.08
Table S2C
target	value	mean	95% value ci low	95% value ci high	datapoints
Prox1
	OC_E13.5	0.15	0.132	0.17	3
	OC_P4	1	0.741	1.349	3
	OCSC	0.039	0.032	0.048	3
p27
	OC_E13.5	0.516	0.478	0.558	3
	OC_P4	1	0.841	1.189	3
	OCSC	0.296	0.26	0.338	3
cMyc
	OC_E13.5	3.342	2.789	4.004	3
	OC_P4	1	0.782	1.278	3
	OCSC	2.612	2.373	2.875	3
Sox2
	OC_E13.5	0.254	0.183	0.352	3
	OC_P4	1	0.747	1.338	3
	OCSC	0.303	0.182	0.502	3
Myosin VIIA
	OC_E13.5	0.671	0.505	0.892	3
	OC_P4	1	0.564	1.772	3
	OCSC	0.24	0.119	0.485	3
Klf4
	OC_E13.5	0.908	0.505	1.631	3
	OC_P4	1	0.157	6.364	2
	OCSC	2.215	1.701	2.886	3
Math1
	OC_E13.5	0.682	0.401	1.159	3
	OC_P4	1	0.701	1.427	3
	OCSC	0.265	0.009	63.39	3
target	p	r2	comparison	ratio	95% ci low	95% ci high	significant
Prox1	1.764e-07	0.997
			OC_E13.5/OC_P4	0.15	0.12	0.187	Yes
			OC_E13.5/OCSC	3.836	3.075	4.785	Yes
			OCSC/OC_P4	0.039	0.031	0.049	Yes
p27	1.597e-06	0.992
			OC_E13.5/OC_P4	0.516	0.451	0.59	Yes
			OC_E13.5/OCSC	1.743	1.524	1.993	Yes
			OCSC/OC_P4	0.296	0.259	0.339	Yes
cMyc	5.592e-06	0.987
			OC_E13.5/OC_P4	3.342	2.775	4.024	Yes
			OC_E13.5/OCSC	1.279	1.063	1.541	Yes
			OCSC/OC_P4	2.612	2.169	3.145	Yes
Sox2	0.0001261	0.958
			OC_E13.5/OC_P4	0.254	0.172	0.374	Yes
			OC_E13.5/OCSC	0.838	0.568	1.236	No
			OCSC/OC_P4	0.303	0.205	0.447	Yes
Myosin VIIA	0.0007895	0.917
			OC_E13.5/OC_P4	0.671	0.386	1.166	No
			OC_E13.5/OCSC	2.793	1.608	4.851	Yes
			OCSC/OC_P4	0.24	0.138	0.417	Yes
Klf4	0.005072	0.886
			OC_E13.5/OC_P4	0.908	0.52	1.584	No
			OC_E13.5/OCSC	0.41	0.249	0.674	Yes
			OCSC/OC_P4	2.215	1.269	3.866	Yes
Math1	0.4715	0.222
			OC_E13.5/OC_P4	0.682	0.028	16.833	No
			OC_E13.5/OCSC	2.575	0.104	63.591	No
			OCSC/OC_P4	0.265	0.011	6.537	No
Reference	M	CV
HPRT1	0.342	0.116
Ubiquitin C	0.342	0.121
Average	0.342	0.118
Table S2D
target	value	mean	95% value ci low	95% value ci high	n
p27
	14DIV Diff	1.579	1.381	1.805	3
	28DIV Diff	2.031	1.986	2.077	2
	OCSC	1	0.8	1.251	3
Prox1
	14DIV Diff	0.578	0.391	0.855	3
	28DIV Diff	1.72	1.331	2.222	2
	OCSC	1	0.942	1.062	3
cMyc
	14DIV Diff	0.305	0.189	0.492	3
	28DIV Diff	0.227	0.029	1.748	2
	OCSC	1	0.926	1.079	3
Klf4
	14DIV Diff	0.304	0.152	0.608	3
	28DIV Diff	0.161	0.123	0.21	2
	OCSC	1	0.754	1.326	3
Sox2
	14DIV Diff	0.504	0.355	0.715	3
	28DIV Diff	0.772	0.399	1.496	2
	OCSC	1	0.653	1.531	3
Myosin VIIA
	14DIV Diff	2.1	1.068	4.128	3
	28DIV Diff	0.696	0.226	2.144	2
	OCSC	1	0.52	1.925	3
Math1
	14DIV Diff	0.07	0.011	0.461	3
	28DIV Diff	0.139	0.138	0.14	2
	OCSC	1	0.004	252.33	3
target	p	r2	comparison	ratio	95% ci low	95% ci high	sign.
p27	0.0005561	0.968
			14DIV Diff/28DIV Diff	0.777	0.639	0.947	Yes
			14DIV Diff/OCSC	1.579	1.324	1.883	Yes
			28DIV Diff/OCSC	2.031	1.668	2.472	Yes
Prox1	0.0005561	0.966
			14DIV Diff/28DIV Diff	0.336	0.249	0.454	Yes
			14DIV Diff/OCSC	0.578	0.442	0.757	Yes
			28DIV Diff/OCSC	1.72	1.273	2.324	Yes
cMyc	0.0005561	0.963
			14DIV Diff/28DIV Diff	1.346	0.838	2.162	No
			14DIV Diff/OCSC	0.305	0.2	0.466	Yes
			28DIV Diff/OCSC	0.227	0.141	0.364	Yes
Klf4	0.0005561	0.96
			14DIV Diff/28DIV Diff	1.888	1.071	3.328	Yes
			14DIV Diff/OCSC	0.304	0.183	0.504	Yes
			28DIV Diff/OCSC	0.161	0.091	0.284	Yes
Sox2	0.008025	0.873
			14DIV Diff/28DIV Diff	0.652	0.425	1	No
			14DIV Diff/OCSC	0.504	0.344	0.738	Yes
			28DIV Diff/OCSC	0.772	0.504	1.184	No
Myosin VIIA	0.01129	0.844
			14DIV Diff/28DIV Diff	3.017	1.455	6.258	Yes
			14DIV Diff/OCSC	2.1	1.094	4.032	Yes
			28DIV Diff/OCSC	0.696	0.336	1.443	No
Math1	0.1744	0.503
			14DIV Diff/28DIV Diff	0.506	0.006	41.531	No
			14DIV Diff/OCSC	0.07	0.001	3.634	No
			28DIV Diff/OCSC	0.139	0.002	11.445	No
Reference	M	CV
TbP	0.288	0.105
Ubiquitin C	0.288	0.095
Average	0.288	0.1
Table S2E
target	value	mean	95% value ci low	95% value ci high	n
Myosin VIIA
	OCSC	1	0.55	1.819	3
	OCSC + EGF	0.293	0.181	0.475	3
Sox2
	OCSC	1	0.589	1.699	3
	OCSC + EGF	0.189	0.085	0.417	3
Prox1
	OCSC	1	0.893	1.12	3
	OCSC + EGF	0.5	0.378	0.661	3
p27
	OCSC	1	0.792	1.263	3
	OCSC + EGF	0.618	0.447	0.855	3
cMyc
	OCSC	1	0.894	1.119	3
	OCSC + EGF	0.636	0.429	0.941	3
Math1
	OCSC	1	0.004	264.987	3
	OCSC + EGF	0.082	0.049	0.139	3
target	p	comparison	ratio	95% ci low	95% ci high
Myosin VIIA	0.006505	OCSC + EGF / OCSC	0.293	0.177	0.486
Sox2	0.006505	OCSC + EGF / OCSC	0.189	0.098	0.363
Prox1	0.006505	OCSC + EGF / OCSC	0.5	0.392	0.636
p27	0.01192	OCSC + EGF / OCSC	0.618	0.473	0.808
cMyc	0.03547	OCSC + EGF / OCSC	0.636	0.444	0.909
Math1	0.1927	OCSC + EGF / OCSC	0.082	0	20.319
Reference	M	CV
HPRT1	0.184	0.062
TbP	0.184	0.066
Average	0.184	0.064
